# Supplementary material for: Unimer suppression enables supersaturated homopolymer swollen micelles with long-term stability after glassy entrapment
Source: Royal Society of Chemistry journal article supplement (doi:10.1039/d3sm01754k), 2024-01-01
Supplement: d3sm01754k1.pdf [file d3sm01754k1.pdf]

## Supporting Information

### Unimer Suppression Enables Supersaturated Homopolymer Swollen Micelles with Long-Term Stability after Glassy Entrapment

Eric R. Williams<sup>1</sup>, Christian X. Ruff<sup>1</sup> and Morgan Stefik<sup>1\*</sup>

<sup>1</sup>Department of Chemistry and Biochemistry, University of South Carolina, Columbia, SC, 29208

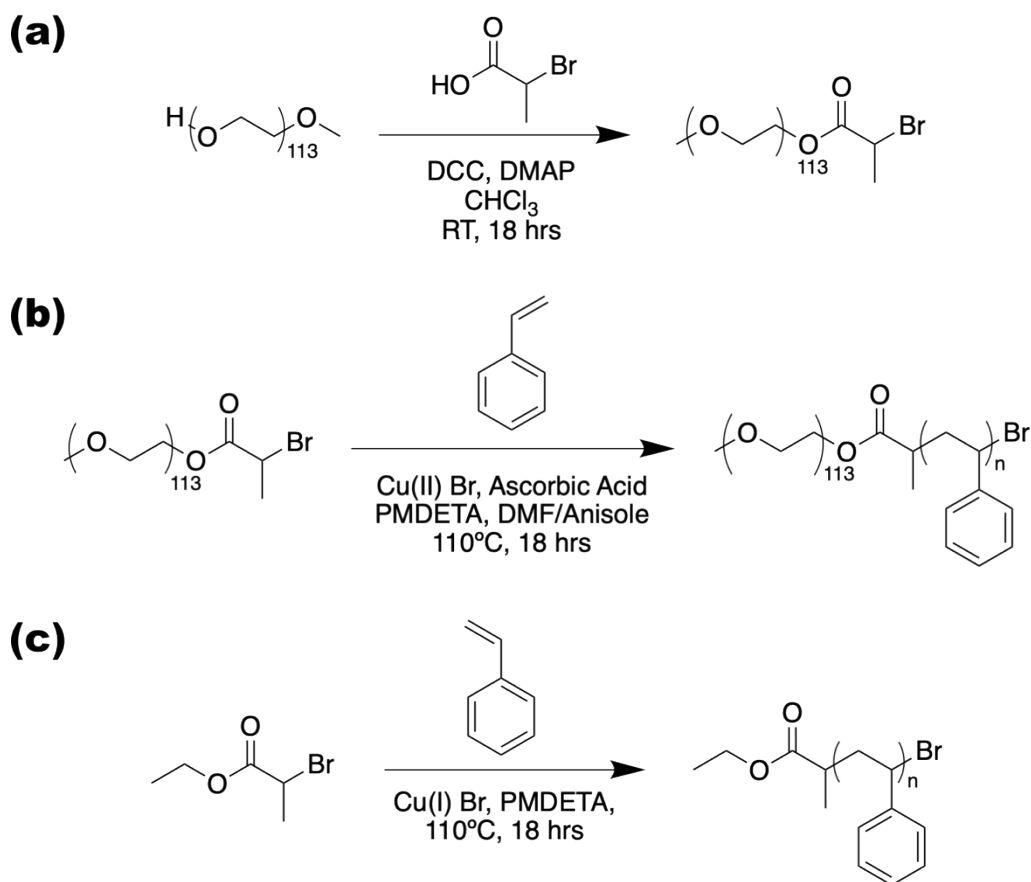

**Figure S1.** – Reaction schemes for the Steglich esterification of the (5k)PEO-OH to yield a macroinitiator for ATRP (a), followed by the synthesis of the PEO-*b*-PS (OS) diblock by AGET-ATRP (b). Homopolymerization of polystyrene (hPS) was carried out via normal ATRP (c).

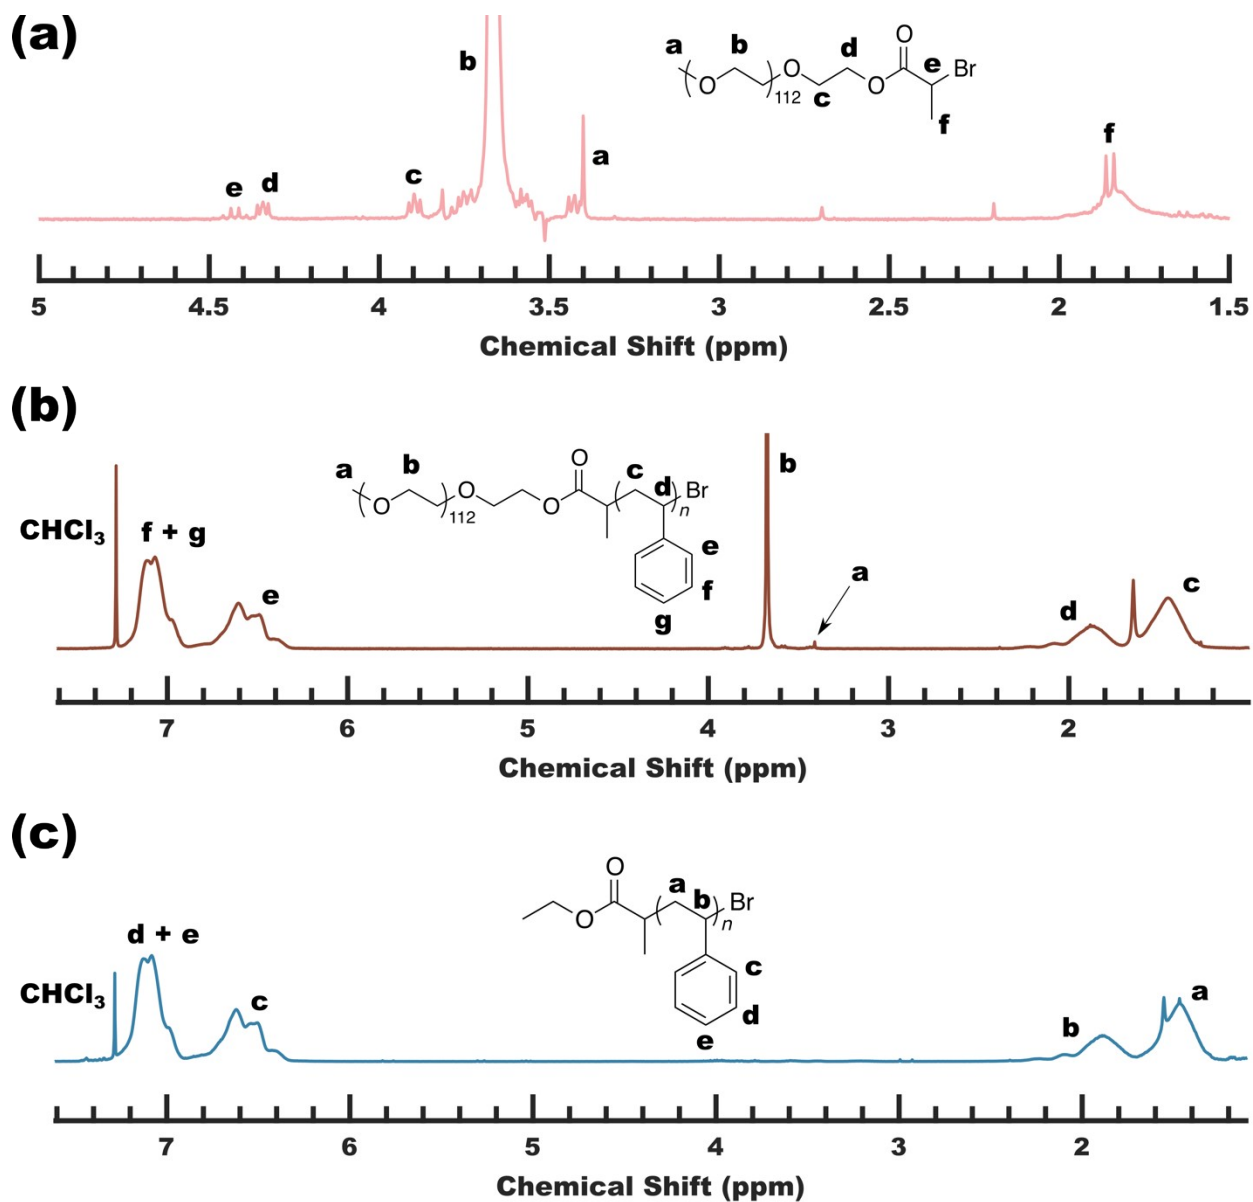

**Figure S2.** –  $^1\text{H-NMR}$  spectra of the (5k)PEO-Br macroinitiator (a), OS diblock polymer (b), and the hPS homopolymer (c). All measurements performed in  $\text{CDCl}_3$ .

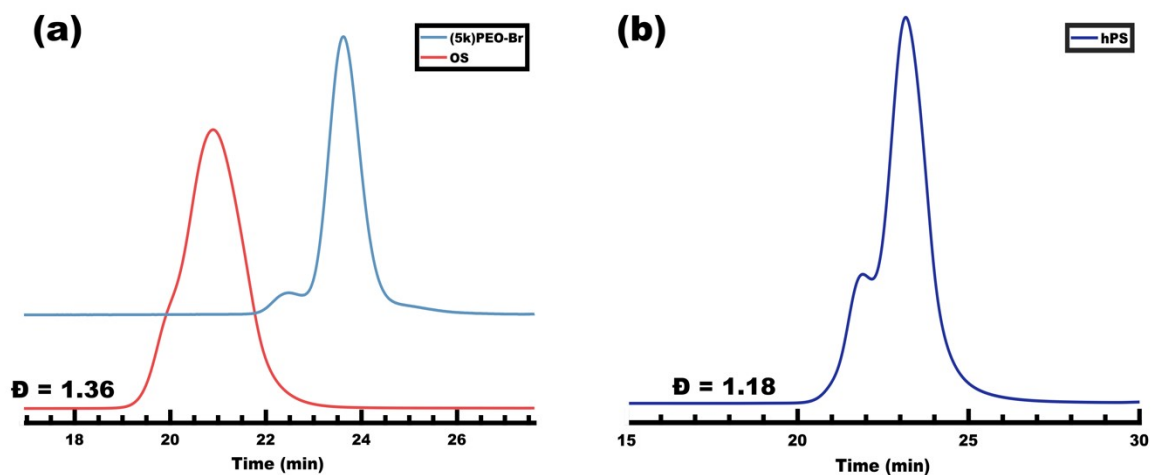

**Figure S3.** – GPC elugrams of the **OS** diblock polymer compared with the (5k)PEO-Br macroinitiator (a) and the **hPS** homopolymer (b).

**Table S1.** – Molecular characteristics of the **OS** diblock and **hPS** homopolymer.

| Sample | $M_n$ of PEO ( $\text{g mol}^{-1}$ ) | $M_n$ of PS ( $\text{g mol}^{-1}$ ) | $\bar{D}$         |
|--------|--------------------------------------|-------------------------------------|-------------------|
| OS     | 5,000                                | 40,091 <sup>a</sup>                 | 1.36 <sup>b</sup> |
| hPS    | N/A                                  | 9,998 <sup>b</sup>                  | 1.18 <sup>b</sup> |

<sup>a</sup>Determined by <sup>1</sup>H-NMR analysis.

<sup>b</sup>Determined by GPC analysis.

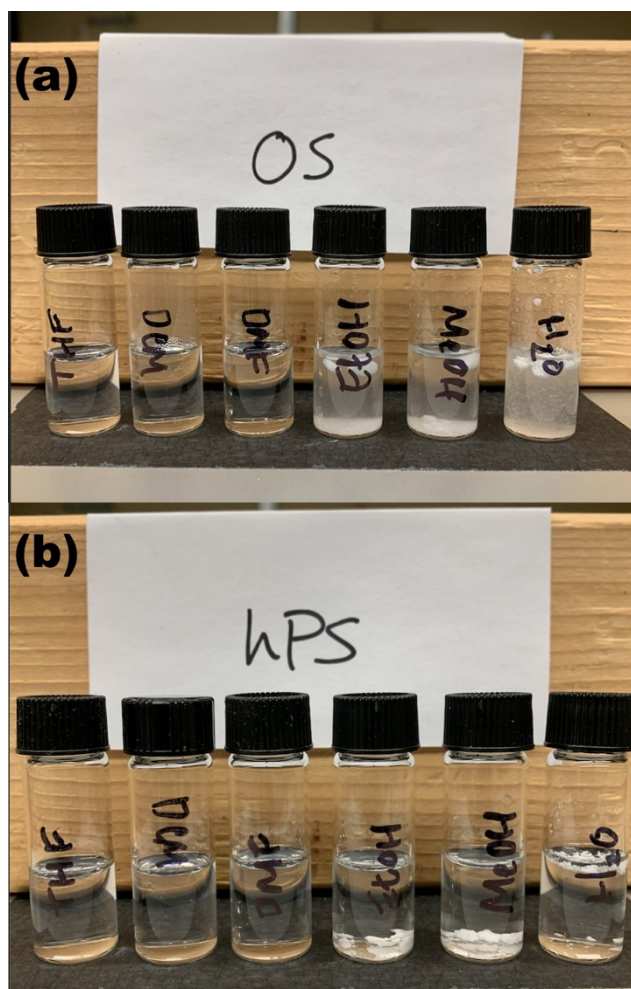

**Figure S4.** – Solubility characteristics of the **OS** (a) and **hPS** (b) polymers in a range of solvents. From left to right: THF, DCM, DMF, EtOH, MeOH, and H<sub>2</sub>O. Note the direct dispersibility of both the **OS** and **hPS** polymers in PS solvents such as THF, DCM, and DMF while both polymers are completely insoluble in PS non-solvents such as EtOH, MeOH, and H<sub>2</sub>O. Samples were prepared at a concentration of 10 mg mL<sup>-1</sup> in their respective solvents.

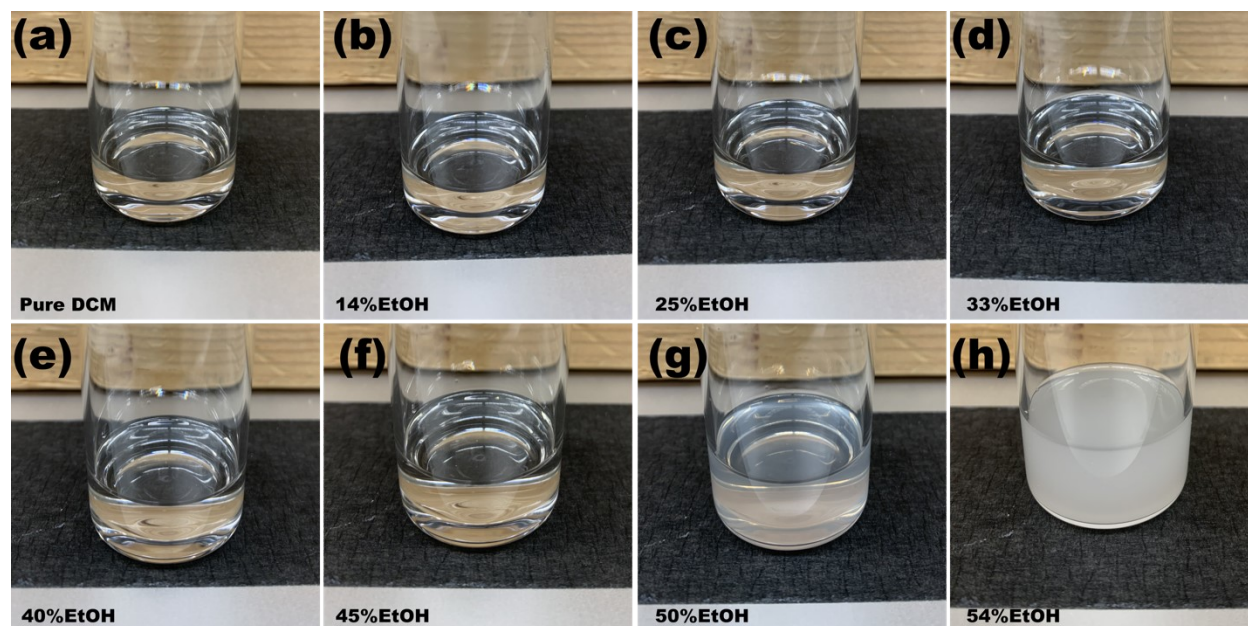

**Figure S5** – Solubility characteristics of the **hPS** homopolymer at a concentration of 2 mg/mL in DCM following additions of EtOH (as vol%). The insolubility of the **hPS** becomes visually apparent around 50 vol% EtOH.

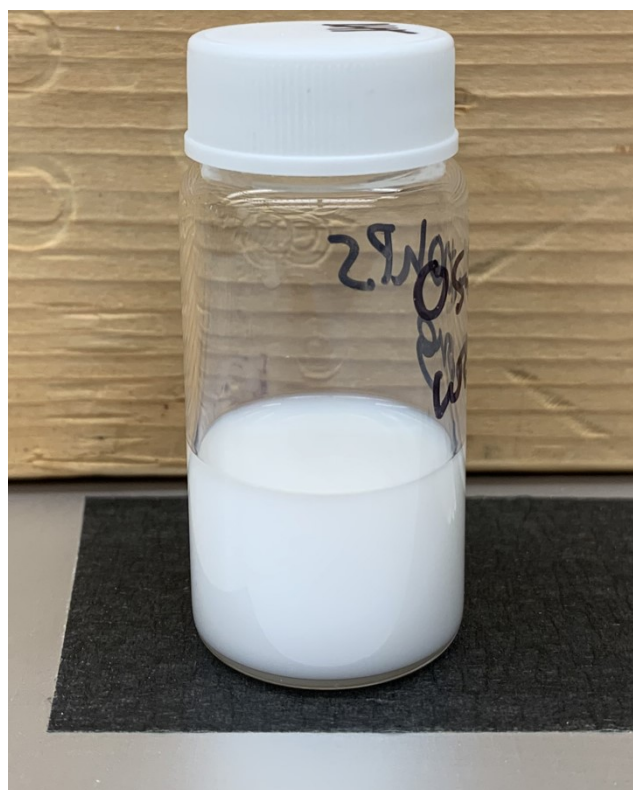

**Figure S6** – Direct addition of EtOH to an **OS/hPS** solution in DCM results in large-scale precipitation of the homopolymer rather than the intended incorporation into the **OS** diblock.

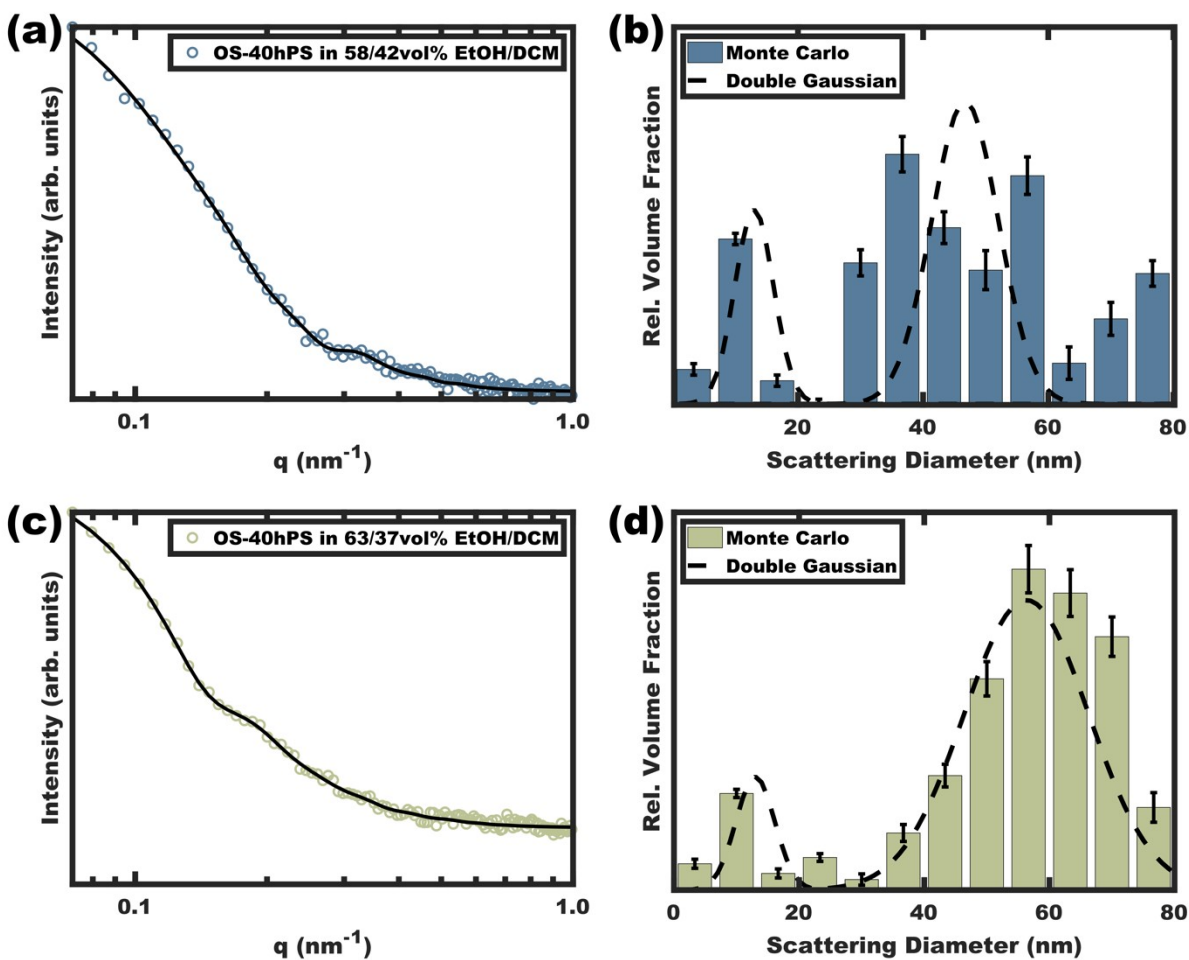

**Figure S7.** – SAXS scattering profiles for **OS-40hPS** micelles in 58/42 vol% EtOH/DCM (a) and 63/37 vol% EtOH/DCM (c). The scattering curves are well fitted with a micelle form factor model that used two Gaussian size distributions (b,d) which were similar to the results of McSAS fitting with a simpler hard sphere model. Here, the smaller size distributions correspond to the homopolymer-unimer aggregates also observed by TEM.



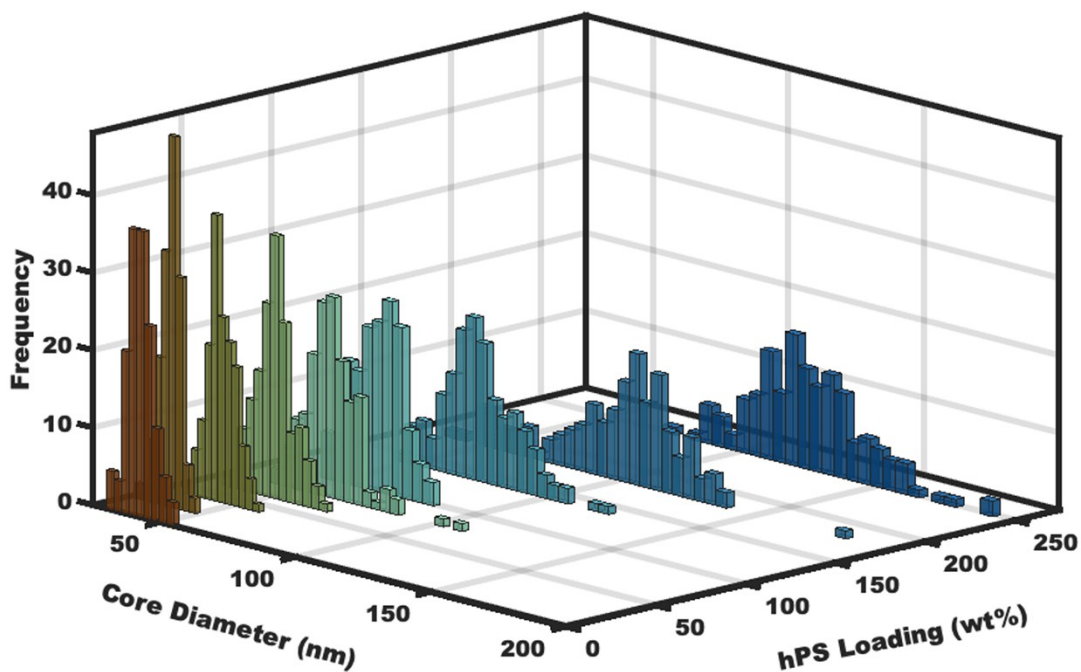

**Figure S8.** – Micelle diameter distributions from TEM data plotted as a function of homopolymer loading. The size distributions were determined from hundreds of measurements upon TEM images.

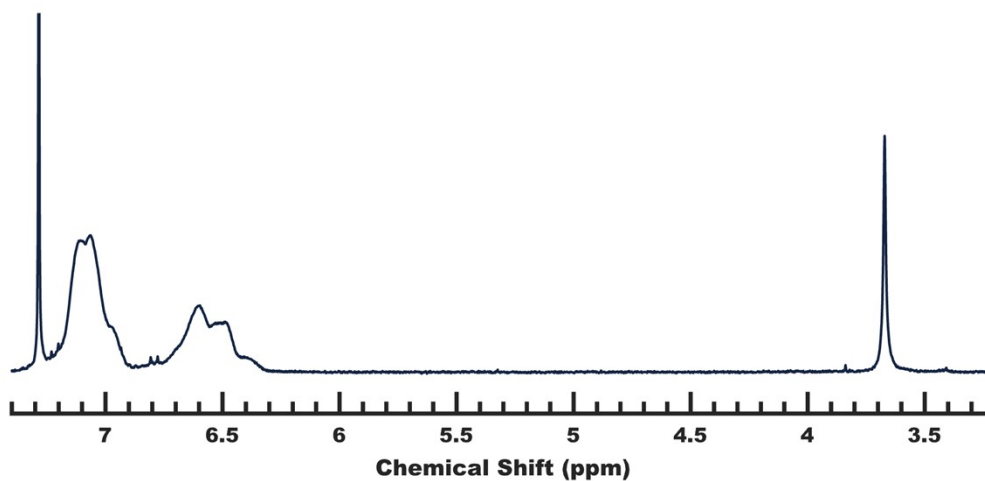

**Figure S9.** –  $^1\text{H-NMR}$  analysis of the **hPS-OS** precipitants resulting from **hPS** additions to **OS** solutions that were not sufficiently selective (i.e., 50 and 58 vol% EtOH). The  $-\text{OCH}_2\text{CH}_2-$  signal of the (5k)PEO is apparent at  $\delta \sim 3.66$  ppm while the aromatic styrene  $-\text{C}_6\text{H}_5$  signal ranges from  $\delta \sim 6.30$ – $7.26$  ppm. The solvent used was  $\text{CDCl}_3$ .

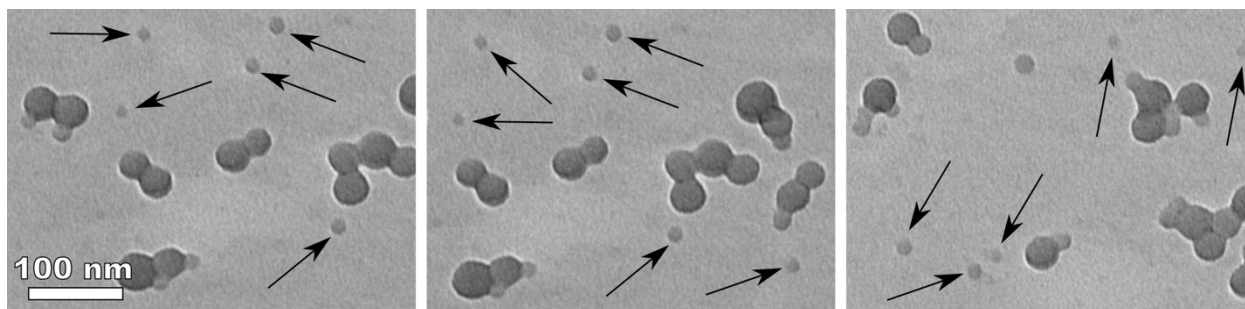

**Figure S10.** – TEM images of low aggregation number **OS-40hPS** unimer-homopolymer aggregates. The average diameter was determined to be  $13.24 \pm 2.76$  nm, with the uncertainty corresponding to the standard deviation.

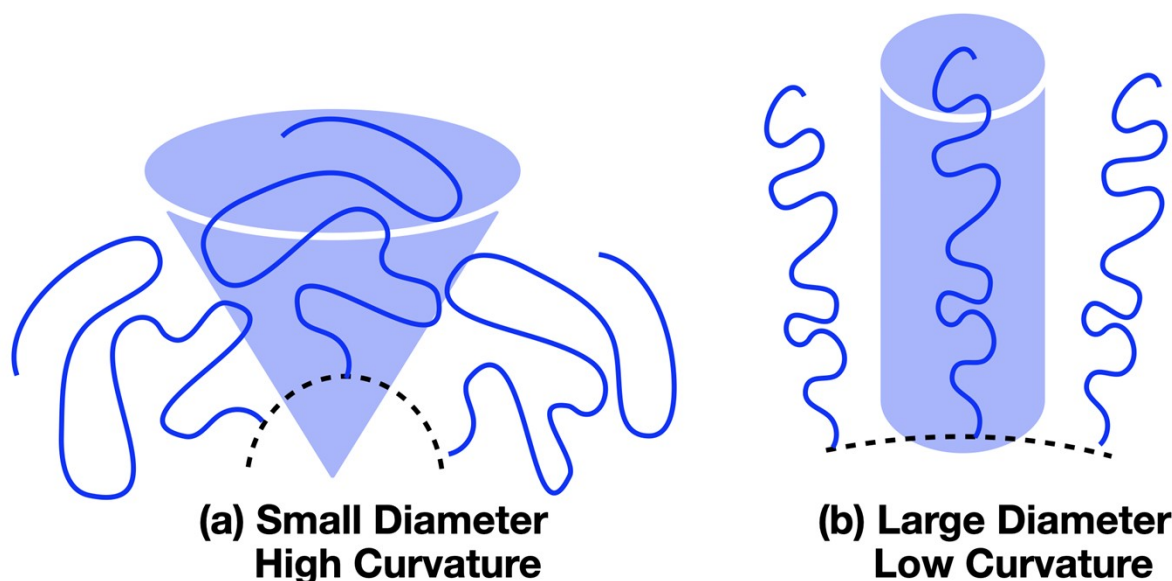

**Figure S11.** – Schematic showing how the curvature (diameter) of the micelle core (dashed line) influences the available volume for each corona block (shaded areas). Smaller diameter cores reduce steric crowding in 3D by provide additional volume for corona blocks to occupy away from the interface. In contrast, larger diameter cores (low curvature) limit the volume available to each corona block where crowding induces corona chain extension.

#### **TEM Micelle Analysis based on Volume Conservation model:**

Geometric aspects of the micelles were analyzed by assuming micelle core volume conservation. TEM analysis is carried out in vacuum which is of course free of any volatile solvents and thus provides model-free dimensions of the solid core. The aggregation number for homopolymer swollen micelles was calculated based upon three simple volume expressions corresponding to an average individual micelle:



$$V_{core} = V_{HP} + V_S \quad (\text{Eq. S1})$$

$$V_{core} = \frac{4}{3}\pi\left(\frac{d_{core}}{2}\right)^3 \quad (\text{Eq. S2})$$

$$V_{HP} = \xi V_{BCP} N_{agg} \quad (\text{Eq. S3})$$

$$V_S = V_{BCP} \phi_S N_{agg} \quad (\text{Eq. S4})$$

For S1,  $V_{core}$  refers to the total volume of the micelle core as well as  $V_{HP}$  and  $V_S$  referring to the sub-volumes occupied by the homopolymer and the PS block of the block polymer. For S2,  $d_{core}$  is the diameter of the micelle core. For S3,  $\xi$  is the homopolymer loading as a mass percent with respect to the mass of the **OS** diblock polymer,  $V_{BCP}$  is the volume of a single block polymer molecule, and  $N_{agg}$  is the number of block polymer chains within a micelle. For S4, furthermore  $\phi_S$  is the PS core-content of the **OS** diblock polymer. The densities of the block polymer and the homopolymer are assumed to be equivalent ( $\rho_{BCP} \approx \rho_{HP}$ ).

When equations S2-S4 are substituted into S1 and solved for the  $N_{agg}$ , the following expression is obtained:

$$N_{agg} = \frac{\pi d_{core}^3}{6V_{BCP}(\phi_S + \xi)} \quad (\text{Eq S5})$$

For the **OS** used in this study,  $V_{BCP}$  was estimated to be 79.24 nm<sup>3</sup>. This method of determining  $N_{agg}$  was used for TEM data alone. Please note that these equations were not needed to derive  $N_{agg}$  from the SAXS data as the used fitting model directly provides  $N_{agg}$ .

### Analysis of Surface Area Per Chain

The surface area per chain was calculated simply as:

$$s = \frac{4\pi\left(\frac{d_{core}}{2}\right)^2}{N_{agg}} = \frac{\pi d_{core}^2}{N_{agg}} \quad (\text{Eq S6})$$

$N_{agg}$  values from both TEM analysis (Eq S5) and SAXS analysis (Eq S16) were directly employable into this expression.

### **Micelle swelling expectations with constant $s$ :**

Following the observation that swollen micelles tend towards a constant interfacial chain density (Fig. 6b), this trend was captured algebraically to yield quantitative expectations for the micelle swelling trajectory.

Solving Equation S6 for  $N_{agg}$  and substituting into Equation S5 yielded:

$$\frac{\pi d_{core}^2}{s} = \frac{\pi d_{core}^3}{6V_{BCP}(\phi_S + \xi)} \quad (\text{Eq S7})$$

Solving this expression for  $d_{core}$  yields a linear trajectory for swollen micelle size as a function of **hPS** loading  $\xi$ :

$$d_{core} = \frac{6V_{BCP}}{s}(\phi_S + \xi) \quad (\text{Eq S8})$$

Furthermore, solving Eq S6 for  $d_{core}$  and substituting into Eq S5 yielded:

$$N_{agg} = \frac{\pi}{6V_{BCP}(\phi_S + \xi)} \left( \frac{SN_{agg}}{\pi} \right)^{3/2} \quad (\text{Eq S9})$$

Solving this expression for  $N_{agg}$  yields a parabolic  $N_{agg}$  trajectory under the constraint of constant interfacial density:

$$N_{agg} = \frac{36\pi V_{BCP}^2 (\phi_S + \xi)^2}{s^3} \quad (\text{Eq S10})$$

### **SAXS Micelle Form Factor Fitting**

The micelle form factor simply assumes that the insoluble blocks of the block copolymer segregate to form a relatively compact core whereas the soluble blocks form a diffuse

corona surrounding the core. This form factor for the micelle contains four different terms: the self-correlation term of the core  $N_{agg}^2 \beta_{core}^2 P_{core}(q)$ , the self-correlation term of the chains  $N_{agg} \beta_{brush}^2 P_{brush}(q)$ , the cross-term between the core and the corona chains  $2N_{agg}^2 \beta_{core} \beta_{brush} S_{brush-core}(q)$ , and the cross term between different chains  $N_{agg}(N_{agg} - 1) \beta_{brush}^2 S_{brush-brush}(q)$ . This model was described by Pedersen and Gerstenberg<sup>1,2</sup> as:

$$I_{mic}(q) = N_{agg}^2 \beta_{core}^2 P_{core}(q) + N_{agg} \beta_{brush}^2 P_{brush}(q) + 2N_{agg}^2 \beta_{core} \beta_{brush} S_{brush-core}(q) + N_{agg}(N_{agg} - 1) \beta_{brush}^2 S_{brush-brush}(q) \quad (\text{Eq S11})$$

Here,  $N_{agg}$  is the aggregation number of diblock copolymers within the micelle. The contrast in scattering length density of a block in the corona or core were respectively addressed with  $\beta_{brush} = V_{brush}(\eta_{brush} - \eta_{solv})$  and  $\beta_{core} = V_{core}(\eta_{core} - \eta_{solv})$ . The terms  $V_{brush}$  and  $V_{core}$  are the volume occupied by a single block in the corona/core (in nm<sup>3</sup>), respectively. The fitting software implementing this model was not parameterized for homopolymer swelling so that additional volume was accounted for by varying  $V_{core}$  with respect to the extent of homopolymer added. The terms  $\eta_{brush}$  and  $\eta_{core}$  correspond to the scattering length densities for the brush and core segments, respectively, while  $\eta_{solv}$  is the scattering length density (SLD) of the solvent. These SLD values were determined using the SASFit. The functions  $P_{core}(q)$ ,  $P_{brush}(q)$ ,  $S_{brush-core}(q)$ , and  $S_{brush-brush}(q)$  are all equal to unity for  $q = 0$ . The definitions of these four functions are repeated below, though they are thoroughly derived elsewhere.<sup>1,2</sup>

$$P_{core}(q, R_{core}) = \Phi^2(qR_{core}) \quad \text{where} \quad \Phi(qR) = \frac{3\sin(qR) - qR\cos(qR)}{(qR)^3} \quad (\text{Eq S12})$$

$$P_{brush}(q, R_g) = \frac{2e^{-x} - 1 + x}{x^2} \quad \text{where} \quad x = R_g^2 q^2 \quad (\text{Eq S13})$$

$$S_{brush-core}(q, R_{core}, R_g, d) = \Phi(qR_{core}) \psi(qR_g) \left( \frac{\sin(q[R_{core} + dR_g])}{q[R_{core} + dR_g]} \right) \quad (\text{Eq S14})$$

Here,  $\psi(qR_g) = \frac{(1 - e^{-x})}{x}$  (form factor amplitude of the chain) with  $x$  being the same as noted above.

$$S_{brush-brush}(q, R_{core}, d, R_g) = \psi^2(qR_g) \left( \frac{\sin(q[R_{core} + dR_g])}{q[R_{core} + dR_g]} \right)^2 \quad (\text{Eq S15})$$

Lastly,  $R_{core}$  refers to the core radius and can be related to the  $N_{agg}$  presented in Eq. S11 by:

$$N_{agg} = \frac{\frac{4}{3}\pi R_{core}^3 (1 - x_{solv,core})}{V_{core}} \quad (\text{Eq S16})$$

Here,  $x_{solv,core}$  refers to the amount of solvent in the micelle core.

The fitting of this form factor model included either a single or a double Gaussian distribution of  $N_{agg}$  to account for micelle size dispersity. This distribution of aggregation numbers was also propagated to the presented distribution of  $R_{core}$ .

We note that SAXS analysis on an absolute intensity scale is necessary to determine the extent of solvent-core swelling from SAXS data alone. Here the combination of TEM and SAXS datasets allowed the comparison of  $N_{agg}$  from TEM to that from SAXS fitting. Statistically indistinguishable  $N_{agg}$  values resulted when assuming  $x_{solv,core}=0$  during SAXS analysis (see Fig. 4b).

**Table S2.** Fit parameters for the **OS-hPS** swelling series after the removal of DCM, present in pure EtOH.

| Sample    | $V_{core}$<br>(nm <sup>3</sup> ) | $V_{brush}$<br>(nm <sup>3</sup> ) | $\eta_{core}$<br>(cm <sup>-2</sup> ) | $\eta_{brush}$<br>(cm <sup>-2</sup> ) | $\eta_{solvent}$<br>(cm <sup>-2</sup> ) |
|-----------|----------------------------------|-----------------------------------|--------------------------------------|---------------------------------------|-----------------------------------------|
| OS        | 66.409                           | 7.5313                            | $9.144 \times 10^{10}$               | $1.029 \times 10^{11}$                | $7.580 \times 10^{10}$                  |
| OS_10hPS  | 73.049                           | 7.5313                            | $9.144 \times 10^{10}$               | $1.029 \times 10^{11}$                | $7.580 \times 10^{10}$                  |
| OS_20hPS  | 79.690                           | 7.5313                            | $9.144 \times 10^{10}$               | $1.029 \times 10^{11}$                | $7.580 \times 10^{10}$                  |
| OS_40hPS  | 92.972                           | 7.5313                            | $9.144 \times 10^{10}$               | $1.029 \times 10^{11}$                | $7.580 \times 10^{10}$                  |
| OS_60hPS  | 106.254                          | 7.5313                            | $9.144 \times 10^{10}$               | $1.029 \times 10^{11}$                | $7.580 \times 10^{10}$                  |
| OS_80hPS  | 119.536                          | 7.5313                            | $9.144 \times 10^{10}$               | $1.029 \times 10^{11}$                | $7.580 \times 10^{10}$                  |
| OS_100hPS | 132.817                          | 7.5313                            | $9.144 \times 10^{10}$               | $1.029 \times 10^{11}$                | $7.580 \times 10^{10}$                  |
| OS_120hPS | 146.099                          | 7.5313                            | $9.144 \times 10^{10}$               | $1.029 \times 10^{11}$                | $7.580 \times 10^{10}$                  |
| Sample    | N                                | $R_{core}$<br>(nm)                | $N_{agg}$                            | $R_g$                                 | $c_0$                                   |
| OS        | $5.575 \times 10^{-32}$          | $19.9 \pm 2.0$                    | $500 \pm 49$                         | 5                                     | 0.0299                                  |

|                  |                         |                |                |   |        |
|------------------|-------------------------|----------------|----------------|---|--------|
| <b>OS_10hPS</b>  | $5.202 \times 10^{-32}$ | $21.6 \pm 2.4$ | $575 \pm 63$   | 5 | 0.0286 |
| <b>OS_20hPS</b>  | $1.294 \times 10^{-32}$ | $21.5 \pm 2.4$ | $520 \pm 58$   | 5 | 0.0084 |
| <b>OS_40hPS</b>  | $8.626 \times 10^{-33}$ | $24.7 \pm 3.0$ | $681 \pm 82$   | 5 | 0.0088 |
| <b>OS_60hPS</b>  | $7.182 \times 10^{-33}$ | $25.6 \pm 3.8$ | $663 \pm 98$   | 5 | 0.0072 |
| <b>OS_80hPS</b>  | $2.440 \times 10^{-32}$ | $31.8 \pm 5.0$ | $1120 \pm 175$ | 5 | 0.0345 |
| <b>OS_100hPS</b> | $3.362 \times 10^{-32}$ | $33.5 \pm 5.8$ | $1190 \pm 206$ | 5 | 0.0373 |
| <b>OS_120hPS</b> | $2.403 \times 10^{-32}$ | $36.8 \pm 7.3$ | $1430 \pm 284$ | 5 | 0.0544 |

**Table S3.** Double-Gaussian fit parameters for the **OS** and **OS\_40hPS** samples with varying EtOH/DCM compositions of 52/48, and 63/37 vol% EtOH/DCM. Please note the 50/50 sample yielded equivocal fits and was thus omitted.

| <b>Sample:</b>                           | <b>V<sub>core</sub><br/>(nm<sup>3</sup>)</b> | <b>V<sub>brush</sub><br/>(nm<sup>3</sup>)</b> | <b><math>\eta_{\text{core}}</math></b> | <b><math>\eta_{\text{brush}}</math></b> | <b><math>\eta_{\text{solv}}</math></b> | <b>X<sub>solv, core</sub></b> | <b>R<sub>g</sub><br/>(nm)</b> | <b>d</b> |
|------------------------------------------|----------------------------------------------|-----------------------------------------------|----------------------------------------|-----------------------------------------|----------------------------------------|-------------------------------|-------------------------------|----------|
| <b>OS-40hPS<br/>(58/42)</b>              | 66.409                                       | 7.531                                         | $9.144 \times 10^1$<br>0               | $1.029 \times 10^{11}$                  | $8.01 \times 10^{10}$                  | 0.24<br>6                     | 9.0                           | 1        |
| <b>OS-40hPS<br/>(63/37)</b>              | 80.344                                       | 7.531                                         | $9.144 \times 10^1$<br>0               | $1.029 \times 10^{11}$                  | $8.01 \times 10^{10}$                  | 0.24<br>7                     | 8.7                           | 1        |
| <b>Major<br/>Gaussian<br/>Parameters</b> | <b>N</b>                                     | <b>R<sub>core</sub><br/>(nm)</b>              | <b>C<sub>0</sub></b>                   |                                         |                                        |                               |                               |          |
| <b>OS-40hPS<br/>(58/42)</b>              | $2.802 \times 10^{-28}$                      | $23.4 \pm 5.3$                                | 0.206                                  |                                         |                                        |                               |                               |          |
| <b>OS-40hPS<br/>(63/37)</b>              | $3.266 \times 10^{-28}$                      | $28.2 \pm 5.0$                                | 0.250                                  |                                         |                                        |                               |                               |          |
| <b>Minor<br/>Gaussian<br/>Parameters</b> | <b>N</b>                                     | <b>R<sub>core</sub><br/>(nm)</b>              | <b>C<sub>0</sub></b>                   |                                         |                                        |                               |                               |          |
| <b>OS-40hPS<br/>(58/42)</b>              | $2.191 \times 10^{-36}$                      | $6.5 \pm 1.6$                                 | 0.206                                  |                                         |                                        |                               |                               |          |
| <b>OS-40hPS</b>                          | $8.673 \times$                               | $6.5 \pm 1.5$                                 | 0.250                                  |                                         |                                        |                               |                               |          |

|                |       |  |  |
|----------------|-------|--|--|
| <b>(63/37)</b> | 10-27 |  |  |
|----------------|-------|--|--|



## References:

1. Pedersen, J. S.; Gerstenberg, M. C. Scattering form factor of block copolymer micelles. *Macromol.* **1996**, *29*, 1363 – 1365.
2. Pedersen, J. S. Form factors of block copolymer micelles with spherical, ellipsoidal, and cylindrical cores. *J. Appl. Cryst.* **2000**, *33*, 637 – 640.
